# Supplementary figures and images for: Optogenetic activators of apoptosis, necroptosis, and pyroptosis
Source: PubMed Central journal article supplement — J Cell Biol. 2022 Apr 14;221(6):e202109038. doi: 10.1083/jcb.202109038 (PMC9014795; doi:10.1083/jcb.202109038), 2022-04-14

**Figure 2D**

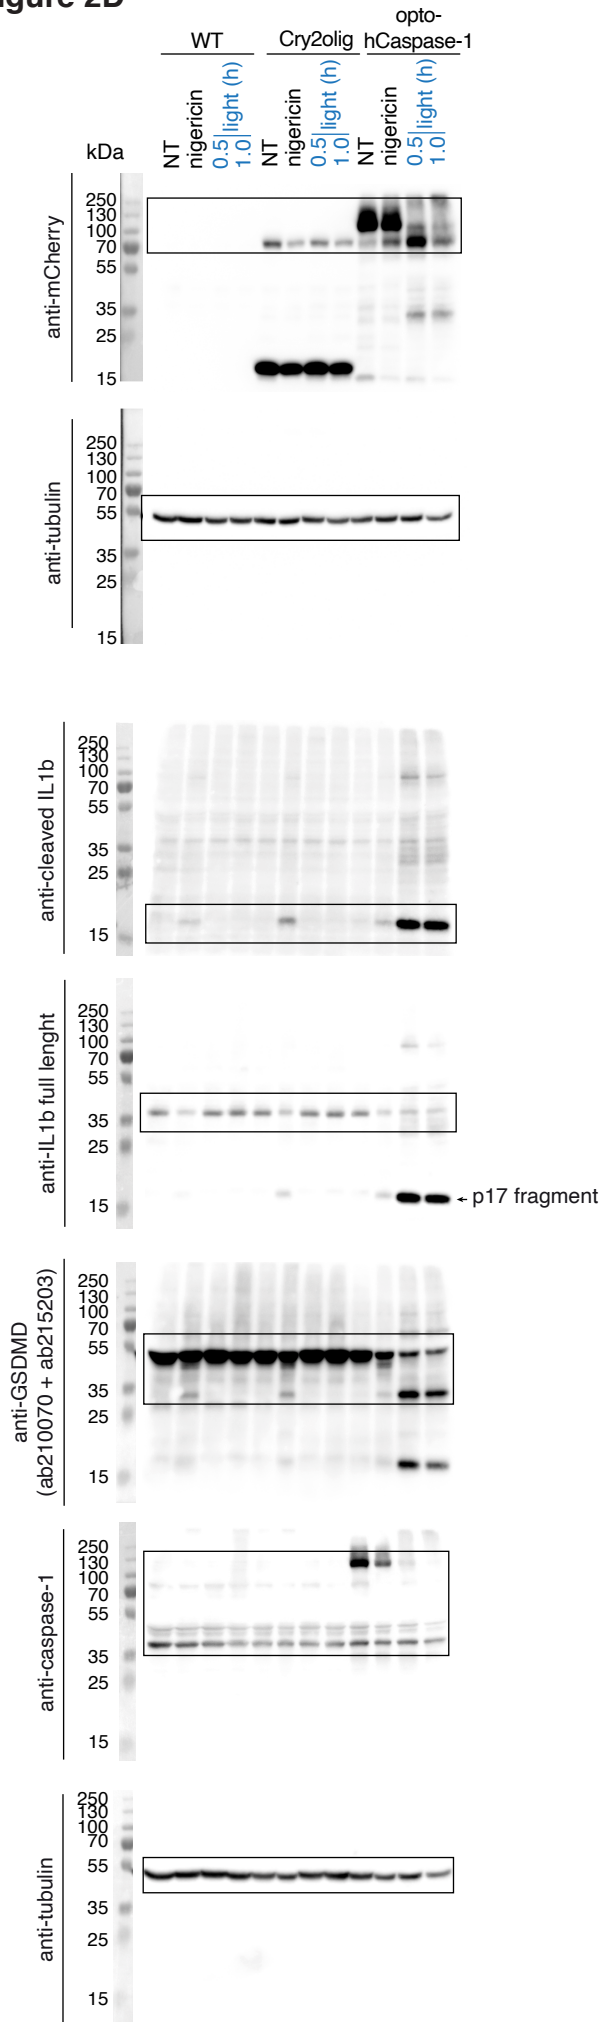

**Figure 2F**

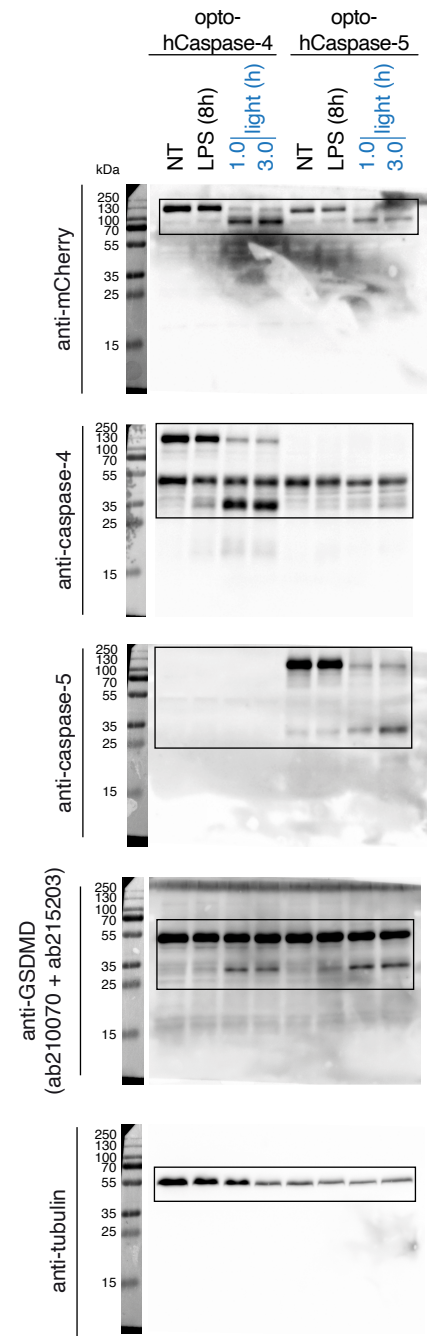

Supplement: JCB_202109038_SourceDataF2.pdf [file JCB_202109038_SourceDataF2.pdf]
